# Supplementary material for: Targeted profiling of 24 sulfated and non-sulfated bile acids in urine using two-dimensional isotope dilution UHPLC-MS/MS
Source: publisher site journal article supplement (doi:10.1515/cclm-2021-1111), 2021-11-19
Supplement: Supplementary file 2 [file j_cclm-2021-1111_suppl_002.docx]

**Suppl. Table 1** Results for within-run and between-run inaccuracy and imprecision.

| **Analyte** | **Within-run inaccracy (n=5), %** | | | | | **Within-run imprecision (n=5), %** | | | | | **Between-run inaccuracy (n=5), %** | | | | | **Between-run imprecision (n=5), %** | | | | |
| --- | --- | --- | --- | --- | --- | --- | --- | --- | --- | --- | --- | --- | --- | --- | --- | --- | --- | --- | --- | --- |
| **QC A** | **QC B** | **QC C** | **QC D** | **QC E** | **QC A** | **QC B** | **QC C** | **QC D** | **QC E** | **QC A** | **QC B** | **QC C** | **QC D** | **QC E** | **QC A** | **QC B** | **QC C** | **QC D** | **QC E** |
| UDCA | -3.4 | 3.5 | 2.3 | -1.6 | -4.9 | 6.7 | 2.9 | 1.4 | 1.0 | 1.7 | 0.20 | 4.7 | 3.8 | -2.1 | -4.2 | 4.9 | 1.2 | 3.2 | 1.2 | 2.9 |
| CDCA | -8.0 | -0.10 | -8.6 | 2.6 | -6.6 | 5.0 | 6.0 | 2.0 | 1.8 | 0.60 | 6.0 | 4.7 | 0.30 | 1.1 | -4.7 | 6.7 | 8.1 | 6.0 | 4.7 | 2.0 |
| DCA | 12 | 7.7 | -3.9 | 4.3 | -1.1 | 3.7 | 4.2 | 5.1 | 4.2 | 3.2 | 6.3 | 5.3 | -1.9 | 1.1 | -1.6 | 3.0 | 3.9 | 5.8 | 1.6 | 3.5 |
| CA | 3.0 | 8.5 | 1.4 | 2.3 | -7.6 | 5.1 | 4.1 | 1.5 | 0.30 | 1.0 | -1.0 | 7.9 | 2.1 | 3.1 | -5.0 | 4.1 | 3.6 | 3.6 | 4.1 | 3.0 |
| GUDCA | -1.8 | 2.3 | -1.9 | 0.90 | -6.1 | 9.4 | 7.2 | 3.6 | 2.7 | 1.4 | -10 | 0.40 | 0.10 | 2.3 | -3.3 | 6.0 | 8.0 | 5.6 | 4.6 | 3.8 |
| GCDCA | 10 | 10 | -8.8 | 6.3 | 5.4 | 5.0 | 0.50 | 2.7 | 3.2 | 3.2 | 6.3 | 7.4 | -6.8 | 3.3 | 4.1 | 9.4 | 6.1 | 6.3 | 5.5 | 2.7 |
| GDCA | 7.0 | 8.0 | -11 | 8.6 | 8.3 | 11 | 2.1 | 0.8 | 3.4 | 3.3 | 0.30 | 8.0 | -8.9 | 3.6 | 5.7 | 14 | 4.1 | 3.9 | 3.8 | 3.5 |
| GCA | 12 | 7.1 | -4.9 | 0.60 | 0.70 | 4.5 | 4.1 | 3.6 | 3.9 | 4.4 | 5.6 | 4.6 | 1.9 | -1.9 | 4.7 | 5.3 | 6.2 | 9.3 | 1.0 | 2.2 |
| TUDCA | -8.3 | 4.9 | 13 | -5.7 | -2.2 | 6.4 | 6.3 | 7.5 | 4.2 | 2.6 | -6.5 | 8.2 | 11 | -8.2 | -6.2 | 7.7 | 4.0 | 3.7 | 5.1 | 4.5 |
| TCDCA | 4.3 | 11 | -4.4 | 5.6 | 9.2 | 14 | 4.8 | 7.7 | 3.7 | 1.7 | 3.7 | 8.4 | -2.2 | 3.3 | 4.9 | 9.1 | 5.8 | 4.1 | 3.1 | 6.5 |
| TDCA | 1.7 | -0.1 | -13 | 3.9 | 6.1 | 9.9 | 8.3 | 5.8 | 4.2 | 4.1 | 9.0 | 4.5 | -9.5 | 8.1 | 8.4 | 9.0 | 8.7 | 5.5 | 3.0 | 6.2 |
| TCA | 9.4 | 0.9 | -2.9 | 1.1 | 0.80 | 11 | 11 | 8.5 | 3.5 | 7.2 | -1.1 | 0.40 | -9.4 | 0.60 | -2.8 | 11 | 11 | 5.6 | 5.3 | 5.0 |
| UDCA-S | 8.3 | 1.6 | 4.3 | 3.8 | -0.40 | 3.9 | 3.5 | 4.2 | 2.9 | 2.2 | -1.7 | -1.7 | -0.10 | 2.7 | 0.30 | 9.0 | 5.2 | 3.6 | 3.0 | 3.1 |
| CDCA-S | 6.8 | -0.7 | -1.2 | -1.5 | -2.7 | 3.6 | 3.4 | 4.0 | 2.8 | 2.2 | 7.1 | 1.3 | 2.6 | 2.2 | -2.8 | 4.5 | 2.3 | 3.2 | 3.4 | 3.0 |
| DCA-S | 2.1 | 2.2 | -1.0 | 0.80 | -3.9 | 9.9 | 4.5 | 4.6 | 2.2 | 0.90 | 5.8 | 2.3 | 0.40 | 2.4 | -1.4 | 7.5 | 7.1 | 3.7 | 2.2 | 4.4 |
| CA-S | 2.9 | 2.7 | 2.6 | 0.70 | -1.5 | 2.2 | 3.4 | 4.7 | 3.5 | 3.8 | 1.2 | -1.4 | 1.0 | -0.70 | -2.7 | 7.6 | 3.1 | 3.1 | 2.7 | 5.4 |
| GUDCA-S | -18 | 3.2 | 2.0 | -0.80 | -2.9 | 13 | 13 | 6.5 | 4.5 | 4.9 | 2.0 | -1.0 | -1.4 | -5.8 | -4.5 | 17 | 11 | 8.6 | 6.7 | 6.4 |
| GCDCA-S | -7.8 | 2.3 | 0.40 | 1.9 | -3.4 | 5.1 | 10 | 5.0 | 4.6 | 3.2 | 2.6 | 6.3 | -3.9 | -1.3 | -3.8 | 7.7 | 9.3 | 5.9 | 6.2 | 4.4 |
| GDCA-S | 6.4 | 8.1 | 2.4 | 1.1 | -1.1 | 10 | 2.5 | 1.2 | 4.3 | 4.6 | -2.0 | 6.4 | 2.1 | 3.4 | 1.4 | 12 | 4.5 | 3.9 | 5.0 | 6.3 |
| GCA-S | 4.8 | 1.9 | 2.2 | 1.6 | -1.5 | 17 | 9.0 | 4.6 | 1.9 | 3.4 | -0.40 | 5.5 | 0.60 | 1.6 | -3.0 | 14 | 7.2 | 5.4 | 2.4 | 2.7 |
| TUDCA-S | 8.9 | 6.1 | 11 | -0.10 | -7.6 | 6.2 | 1.7 | 5.8 | 4.1 | 2.8 | 5.8 | -0.30 | 5.0 | -4.4 | -8.9 | 13 | 7.5 | 4.1 | 2.5 | 3.4 |
| TCDCA-S | -4.4 | 6.8 | -1.6 | -7.1 | -9.1 | 8.8 | 6.0 | 5.7 | 3.5 | 2.3 | -2.2 | 1.2 | 1.0 | -0.30 | -7.8 | 13 | 6.7 | 6.1 | 2.5 | 3.3 |
| TDCA-S | 3.8 | 5.6 | 3.4 | -3.8 | -11 | 6.5 | 8.2 | 4.0 | 3.8 | 2.2 | 8.4 | 0.40 | 1.5 | -2.4 | -7.9 | 7.1 | 8.3 | 3.4 | 5.6 | 3.8 |
| TCA-S | -12 | 0.40 | 3.8 | -5.4 | -13 | 4.4 | 7.2 | 4.4 | 3.6 | 2.0 | -5.5 | 4.1 | 7.9 | -3.3 | -9.6 | 8.7 | 6.3 | 2.8 | 3.1 | 6.0 |

QC A, 1.00 µg/L; QC B, 3.00 µg/L; QC C, 8.00 µg/L; QC D, 400 µg/L; QC E, 750 µg/L.
