# Supplementary material for: Targeted profiling of 24 sulfated and non-sulfated bile acids in urine using two-dimensional isotope dilution UHPLC-MS/MS
Source: publisher site journal article supplement (doi:10.1515/cclm-2021-1111), 2021-11-19
Supplement: Supplementary file 3 [file j_cclm-2021-1111_suppl_003.docx]

**Suppl. Table 2** Results for stability tests.

| **Analyte** | **Change processed stability, %**  **24 h, 4°C (n=3)** | | | | | **Change unprocessed stability, %**  **5 h, RT (n=3)** | | | | | **Change freeze-thaw stability, %**  **3 cycles, -80°C (n=3)** | | | | | **Change longterm stability, %**  **8 weeks, -80°C (n=3)** | | | | |
| --- | --- | --- | --- | --- | --- | --- | --- | --- | --- | --- | --- | --- | --- | --- | --- | --- | --- | --- | --- | --- |
| **QC A** | **QC B** | **QC C** | **QC D** | **QC E** | **QC A** | **QC B** | **QC C** | **QC D** | **QC E** | **QC A** | **QC B** | **QC C** | **QC D** | **QC E** | **QC A** | **QC B** | **QC C** | **QC D** | **QC E** |
| UDCA | 8.8 | 8.1 | 6.1 | 0.90 | 1.2 | 5.9 | 7.0 | 6.2 | 4.1 | 2.8 | 9.5 | 7.4 | 8.3 | 4.4 | 2.5 | 1.0 | 2.8 | 6.1 | -5.5 | -5.0 |
| CDCA | 5.8 | 8.5 | 7.9 | 3.7 | -3.8 | 2.3 | 8.4 | 3.7 | 8.3 | 4.7 | 3.2 | 8.1 | 2.8 | 9.2 | 2.1 | 2.7 | 8.9 | -0.93 | -3.7 | -6.6 |
| DCA | 4.3 | 6.7 | -3.3 | 4.6 | 2.6 | 1.9 | 9.2 | 4.8 | 4.5 | 6.1 | 1.1 | 4.3 | 0.70 | 4.5 | 3.7 | -3.3 | 4.9 | -6.8 | -1.1 | -0.48 |
| CA | 6.6 | 7.5 | 5.5 | 5.4 | -4.6 | 8.2 | 8.3 | 9.1 | 9.2 | 0.60 | 7.1 | 8.0 | 8.8 | 7.8 | -2.1 | -1.3 | 6.2 | 3.2 | -5.3 | -5.3 |
| GUDCA | -2.1 | 3.9 | 2.7 | 0.70 | 0.33 | -1.7 | 7.9 | 13 | 7.3 | 7.2 | -3.4 | 10 | 9.9 | 8.6 | 7.6 | -5.2 | -4.0 | 3.4 | 1.0 | -2.6 |
| GCDCA | -1.6 | 1.6 | -8.9 | 2.9 | 7.7 | -5.3 | 8.5 | -7.9 | 11 | 12 | -4.8 | 5.1 | -11 | 10 | 12 | -5.6 | -2.4 | -7.4 | 3.5 | -0.80 |
| GDCA | 6.5 | -1.4 | -8.2 | 2.7 | 8.9 | -7.0 | 10 | -10 | 13 | 14 | 2.3 | 1.0 | -9.8 | 12 | 13 | -3.6 | -1.1 | -9.4 | 2.0 | 5.6 |
| GCA | 16 | 4.3 | 1.6 | 6.5 | 7.7 | 15 | 13 | 1.3 | 6.4 | 7.4 | 11 | 10 | 2.2 | 7.2 | 9.9 | 2.1 | 8.4 | -4.1 | -3.6 | -1.8 |
| TUDCA | 13 | 7.9 | 8.2 | 0.70 | 2.0 | 7.3 | 8.5 | 6.8 | 0.50 | -0.41 | 2.5 | 5.7 | 7.6 | -0.81 | -0.58 | 9.8 | 6.6 | 6.4 | -11 | -11 |
| TCDCA | 1.4 | 9.7 | -7.6 | 1.6 | 7.6 | -7.3 | 9.1 | -5.4 | 10 | 11 | -5.9 | -2.2 | -9.4 | 10 | 8.7 | -0.10 | 9.9 | -7.7 | 2.6 | 4.6 |
| TDCA | -5.0 | -2.9 | -9.8 | 6.8 | 6.9 | -10 | 3.7 | -12 | 14 | 10 | -5.7 | -7.7 | -12 | 14 | 13 | -2.5 | -1.0 | -10 | 7.0 | 5.0 |
| TCA | -3.1 | 2.2 | -8.5 | 3.1 | 1.2 | -14 | 2.2 | -0.52 | 2.2 | 8.6 | -0.10 | 1.7 | -5.1 | 7.5 | 8.0 | 5.7 | 2.7 | -7.3 | -1.9 | -11 |
| UDCA-S | 12 | 5.2 | 13 | 9.1 | 9.4 | 6.0 | 6.8 | 5.5 | -1.0 | 6.7 | 2.0 | 4.7 | 5.2 | 3.0 | 5.5 | 2.7 | -0.21 | 0.20 | -2.4 | -0.93 |
| CDCA-S | 14 | 1.0 | 2.3 | 0.50 | -3.9 | 9.1 | 7.6 | -1.0 | -0.93 | -1.8 | 14 | 1.9 | 1.0 | -7.5 | -1.1 | 5.4 | -7.7 | -6.4 | -3.2 | -4.3 |
| DCA-S | 11 | 6.4 | -2.2 | 2.3 | -3.1 | 6.7 | 6.9 | 3.2 | 2.4 | 4.2 | 11 | 8.0 | 5.6 | 3.5 | 2.9 | 6.5 | -0.28 | -0.87 | -7.2 | -9.3 |
| CA-S | 7.0 | -3.4 | -4.6 | 2.5 | 0.70 | 7.9 | 3.7 | 7.2 | 4.4 | 3.6 | 2.8 | 4.3 | 7.8 | 4.4 | 2.4 | -8.9 | -7.0 | 5.1 | 1.7 | -3.0 |
| GUDCA-S | 8.5 | 10 | 14 | 13 | 7.8 | 5.5 | 5.0 | 5.1 | 2.4 | 0.80 | 11 | 7.5 | 7.1 | 7.9 | 1.0 | 15 | -3.3 | 5.0 | -3.3 | -6.1 |
| GCDCA-S | -2.9 | -1.8 | 0.11 | 3.7 | -3.4 | 2.9 | 5.2 | 11 | 3.7 | -0.60 | -2.0 | 4.4 | 8.6 | 7.1 | -0.28 | 6.9 | -3.5 | 2.9 | -0.74 | -7.2 |
| GDCA-S | 8.4 | 5.1 | 1.9 | 5.8 | 4.2 | 8.9 | 6.3 | 8.3 | 6.4 | 5.1 | 5.0 | 1.9 | 10 | 6.2 | 2.4 | -6.2 | -5.0 | -0.88 | -0.20 | -1.7 |
| GCA-S | 20 | 6.8 | 1.7 | 2.8 | -4.4 | 16 | 10 | 6.7 | 11 | 8.6 | 17 | 5.4 | 12 | 7.7 | 6.1 | 6.8 | -1.3 | 8.4 | -3.5 | -2.5 |
| TUDCA-S | 5.8 | 5.6 | 8.0 | 0.80 | -3.0 | -0.60 | -1.7 | -0.70 | 11 | 8.9 | 3.6 | 8.4 | 14 | -3.0 | -6.7 | 5.1 | 3.9 | 3.2 | 10 | -10 |
| TCDCA-S | 1.0 | 6.0 | 8.2 | -0.69 | -3.2 | -10 | 11 | 7.5 | -0.80 | -1.9 | -13 | 8.0 | 6.6 | -1.7 | -1.5 | -9.0 | 4.7 | 3.4 | -5.4 | -9.4 |
| TDCA-S | -8.9 | 5.3 | 6.0 | -1.4 | -7.3 | -1.9 | 6.7 | 6.6 | 5.4 | -3.0 | 5.2 | 5.7 | 9.0 | 4.9 | -2.6 | 0.10 | 7.5 | 8.2 | -8.8 | -9.3 |
| TCA-S | 7.6 | 11 | 7.3 | -2.7 | -10 | -1.4 | 8.5 | 15 | 2.9 | -0.91 | -2.2 | 5.8 | 11 | 4.6 | -8.2 | -4.0 | 1.3 | 12 | -3.3 | -9.6 |

QC A, 1.00 µg/L; QC B, 3.00 µg/L; QC C, 8.00 µg/L; QC D, 400 µg/L; QC E, 750 µg/L.
