# Supplementary material for: Targeted profiling of 24 sulfated and non-sulfated bile acids in urine using two-dimensional isotope dilution UHPLC-MS/MS
Source: publisher site journal article supplement (doi:10.1515/cclm-2021-1111), 2021-11-19
Supplement: Supplementary file 4 [file j_cclm-2021-1111_suppl_004.docx]

**Suppl. Table 3** Targeted profiling of sulfated and non-sulfated bile acids in urine (n=40).

| **Urine#** | **Non-sulfated bile acids, µg/L** | | | | | | | | | | | | | | | | | | | | | | |
| --- | --- | --- | --- | --- | --- | --- | --- | --- | --- | --- | --- | --- | --- | --- | --- | --- | --- | --- | --- | --- | --- | --- | --- |
| **UDCA** | **CDCA** | **DCA** | **CA** | | | **GUDCA** | | **GCDCA** | | **GDCA** | | **GCA** | | **TUDCA** | | **TCDCA** | | **TDCA** | | **TCA** | | **∑** |
| 1 | 209 | <LLOQ | 16.1 | 6.83 | | | >ULOQ | | 107 | | 176 | | 5350 | | 4260* | | 67.2 | | 66.6 | | 1830* | | 62100 |
| 2 | <LLOQ | <LLOQ | <LLOQ | 10.6 | | | 5.32 | | 1.50 | | 1.43 | | 53.7 | | 1.15 | | 3.08 | | 3.29 | | 48.6 | | 130 |
| 3 | <LLOQ | <LLOQ | 5.49 | 3.58 | | | 5.47 | | 2.32 | | 1.02 | | 5.70 | | 5.84 | | <LLOQ | | <LLOQ | | <LLOQ | | 31.9 |
| 4 | <LLOQ | <LLOQ | <LLOQ | 4.19 | | | 43.7 | | 10.2 | | 5.12 | | 30.3 | | 4.76 | | 1.21 | | 1.17 | | 2.04 | | 104 |
| 5 | 85.6 | 12.1 | 15.5 | 307 | | | 2660* | | 32.8 | | 19.1 | | 376 | | 16.5 | | 1.72 | | <LLOQ | | 2.89 | | 3530 |
| 6 | <LLOQ | <LLOQ | <LLOQ | 14.5 | | | 1.59 | | 50.0 | | <LLOQ | | 174 | | <LLOQ | | 5.33 | | <LLOQ | | 12.8 | | 261 |
| 7 | <LLOQ | 1.52 | 13.9 | 30.8 | | | 4.53 | | 4.93 | | 4.09 | | 24.0 | | 11.4 | | 1.12 | | <LLOQ | | 3.60 | | 101 |
| 8 | 31.1 | <LLOQ | <LLOQ | 2.20 | | | 7620* | | 44.4 | | <LLOQ | | 393 | | 666 | | 24.5 | | <LLOQ | | 80.5 | | 8860 |
| 9 | <LLOQ | <LLOQ | 8.07 | 17.6 | | | 5.40 | | 2.34 | | 9.69 | | 22.0 | | 204 | | 1.19 | | 2.49 | | 14.1 | | 288 |
| 10 | <LLOQ | 1.24 | <LLOQ | 12.8 | | | <LLOQ | | 16.0 | | 5.83 | | 112 | | <LLOQ | | 4.56 | | 1.48 | | 13.6 | | 169 |
| 11 | <LLOQ | <LLOQ | <LLOQ | 3.43 | | | 3.29 | | <LLOQ | | <LLOQ | | 10.4 | | <LLOQ | | <LLOQ | | <LLOQ | | <LLOQ | | 21.6 |
| 12 | 2.15 | 4.87 | 8.35 | 66.2 | | | 7.32 | | 6.49 | | 3.78 | | 14.7 | | <LLOQ | | 1.02 | | <LLOQ | | 2.84 | | 119 |
| 13 | <LLOQ | 2.37 | 17.2 | 15.1 | | | 28.5 | | 5.59 | | 8.90 | | 13.8 | | 10.00 | | <LLOQ | | 1.72 | | 2.82 | | 107 |
| 14 | 1.06 | <LLOQ | <LLOQ | 23.4 | | | 135 | | 3.76 | | <LLOQ | | 36.6 | | 5.47 | | 1.02 | | <LLOQ | | 1.13 | | 210 |
| 15 | <LLOQ | <LLOQ | 1.38 | 1.21 | | | 18.9 | | 8.76 | | 16.4 | | 47.5 | | 1.67 | | 2.29 | | 2.64 | | 4.77 | | 106 |
| 16 | 158 | <LLOQ | 27.5 | 4.26 | | | 4520* | | 11.9 | | 32.5 | | 478 | | 1410* | | 12.2 | | 15.4 | | 147 | | 6820 |
| 17 | <LLOQ | <LLOQ | <LLOQ | <LLOQ | | | 4.42 | | 23.6 | | <LLOQ | | 9.74 | | <LLOQ | | 3.64 | | <LLOQ | | 1.97 | | 46.9 |
| 18 | 7.97 | 17.4 | 4.75 | 155 | | | 208 | | 11.1 | | 1.68 | | 23.8 | | 2.78 | | 4.27 | | <LLOQ | | 4.51 | | 441 |
| 19 | 89.8 | 3.15 | <LLOQ | 94.3 | | | 8.31 | | 5.39 | | <LLOQ | | <LLOQ | | <LLOQ | | <LLOQ | | <LLOQ | | 1.83 | | 206 |
| 20 | <LLOQ | 1.91 | 4.71 | 99.4 | | | 91.0 | | 33.6 | | 26.1 | | 536 | | 2.20 | | 2.96 | | 2.05 | | 10.5 | | 811 |
| 21 | <LLOQ | <LLOQ | <LLOQ | 27.4 | | | 1.57 | | 22.5 | | <LLOQ | | 185 | | <LLOQ | | 2.04 | | <LLOQ | | 10.4 | | 252 |
| 22 | <LLOQ | <LLOQ | 5.98 | 3.56 | | | 14.1 | | 4.07 | | 13.8 | | 50.5 | | 1.21 | | 1.88 | | <LLOQ | | 14.1 | | 111 |
| 23 | 4.69 | 1.68 | <LLOQ | 16.3 | | | 12.2 | | 2.79 | | <LLOQ | | 5.16 | | <LLOQ | | <LLOQ | | <LLOQ | | <LLOQ | | 45.8 |
| 24 | <LLOQ | <LLOQ | <LLOQ | 1.80 | | | 2.58 | | 3.08 | | 1.58 | | 12.0 | | <LLOQ | | 1.14 | | <LLOQ | | 2.55 | | 27.3 |
| 25 | <LLOQ | <LLOQ | 4.15 | 16.0 | | | 8.06 | | 3.38 | | 4.79 | | 6.06 | | 1.92 | | 1.03 | | <LLOQ | | <LLOQ | | 47.4 |
| 26 | 4.00 | 3.05 | 1.05 | 34.7 | | | 60.5 | | 4.51 | | 1.35 | | 15.2 | | <LLOQ | | <LLOQ | | <LLOQ | | 1.58 | | 127 |
| 27 | <LLOQ | <LLOQ | <LLOQ | 7.84 | | | <LLOQ | | 5.82 | | <LLOQ | | 68.3 | | <LLOQ | | 1.57 | | <LLOQ | | 10.8 | | 97.9 |
| 28 | 1.44 | 1.50 | 1.31 | 76.2 | | | 30.7 | | 2.35 | | 2.86 | | 27.2 | | 2.31 | | <LLOQ | | <LLOQ | | 1.63 | | 148 |
| 29 | <LLOQ | <LLOQ | 7.98 | 6.30 | | | <LLOQ | | 1.05 | | 2.88 | | 7.78 | | 6.85 | | <LLOQ | | 1.12 | | 1.56 | | 37.5 |
| 30 | <LLOQ | <LLOQ | <LLOQ | 4.36 | | | <LLOQ | | 5.61 | | <LLOQ | | 57.5 | | <LLOQ | | <LLOQ | | <LLOQ | | 4.47 | | 76.0 |
| 31 | <LLOQ | <LLOQ | 4.94 | 2.74 | | | 1.36 | | <LLOQ | | 1.13 | | 5.22 | | <LLOQ | | <LLOQ | | <LLOQ | | <LLOQ | | 18.9 |
| 32 | <LLOQ | <LLOQ | 1.01 | <LLOQ | | | <LLOQ | | <LLOQ | | <LLOQ | | 1.34 | | <LLOQ | | <LLOQ | | <LLOQ | | <LLOQ | | 7.35 |
| 33 | 84.6 | <LLOQ | <LLOQ | 30.0 | | | 159 | | 2.77 | | <LLOQ | | 46.5 | | 2.39 | | <LLOQ | | <LLOQ | | 1.44 | | 329 |
| 34 | <LLOQ | <LLOQ | 6.12 | 8.99 | | | 9.75 | | 1.46 | | 3.78 | | 7.36 | | 5.15 | | <LLOQ | | <LLOQ | | <LLOQ | | 45.1 |
| 35 | <LLOQ | <LLOQ | <LLOQ | 5.72 | | | 2.56 | | 8.09 | | <LLOQ | | 60.5 | | <LLOQ | | <LLOQ | | <LLOQ | | 1.89 | | 82.3 |
| 36 | 1.81 | 1.75 | 1.66 | 10.2 | | | 12.7 | | 9.88 | | 1.98 | | 9.08 | | 2.59 | | 9.20 | | 1.08 | | 4.89 | | 66.8 |
| 37 | <LLOQ | <LLOQ | <LLOQ | <LLOQ | | | <LLOQ | | <LLOQ | | <LLOQ | | 6.92 | | <LLOQ | | <LLOQ | | <LLOQ | | 2.31 | | 14.2 |
| 38 | <LLOQ | 3.33 | 16.1 | 94.8 | | | 3.96 | | <LLOQ | | <LLOQ | | 7.85 | | <LLOQ | | <LLOQ | | <LLOQ | | <LLOQ | | 130 |
| 39 | <LLOQ | <LLOQ | <LLOQ | 1.37 | | | <LLOQ | | 1.26 | | <LLOQ | | 31.4 | | <LLOQ | | <LLOQ | | <LLOQ | | 1.31 | | 39.4 |
| 40 | 5.68 | <LLOQ | 3.78 | 3.97 | | | 5.28 | | 2.67 | | 6.83 | | <LLOQ | | 7.15 | | 1.05 | | 1.56 | | 7.11 | | 46.1 |
| Mean | 17.5 | 1.70 | 4.65 | 30.7 | | | 1640 | | 11.6 | | 9.01 | | 208 | | 166 | | 4.09 | | 2.86 | | 56.4 | | 2160 |
| Median | 0.500 | 0.500 | 1.18 | 9.62 | | | 6.40 | | 4.72 | | 1.51 | | 23.9 | | 1.44 | | 1.04 | | 0.500 | | 2.69 | | 54.0 |
| **Urine#** | **Sulfated bile acids, µg/L** | | | | | | | | | | | | | | | | | | | | | | |
| **UDCA-S** | **CDCA-S** | **DCA-S** | | **CA-S** | **GUDCA-S** | | **GCDCA-S** | | **GDCA-S** | | **GCA-S** | | **TUDCA-S** | | **TCDCA-S** | | **TDCA-S** | | **TCA-S** | | **∑** | |
| 1 | 10000* | 52.1 | 119 | | 20.0 | >ULOQ | | 5900* | | 8760* | | 2850* | | >ULOQ | | 5200* | | 5210* | | 979 | | 139000 | |
| 2 | 4.07 | 3.13 | 2.02 | | <LLOQ | 19.7 | | 32.8 | | 12.5 | | 9.71 | | 6.11 | | 103 | | 86.7 | | 25.2 | | 306 | |
| 3 | 36.6 | <LLOQ | <LLOQ | | <LLOQ | 13.0 | | 53.5 | | 18.2 | | <LLOQ | | 3.54 | | 1.72 | | 4.01 | | <LLOQ | | 133 | |
| 4 | 178 | 4.91 | 13.3 | | <LLOQ | 62.7 | | 571 | | 464 | | 16.9 | | 14.6 | | 97.0 | | 169 | | 1.44 | | 1590 | |
| 5 | 633 | 16.7 | 12.9 | | 1.88 | 4440* | | 507 | | 463 | | 69.4 | | 133 | | 15.7 | | 14.6 | | <LLOQ | | 6310 | |
| 6 | 4.15 | 2.54 | <LLOQ | | <LLOQ | 5.16 | | 641 | | <LLOQ | | 72.2 | | 1.82 | | 42.7 | | <LLOQ | | 8.16 | | 779 | |
| 7 | 82.8 | 8.15 | 18.6 | | 1.43 | 149 | | 845 | | 1390* | | 54.5 | | 2.75 | | 85.8 | | 95.4 | | 2.93 | | 2740 | |
| 8 | 7180* | 43.2 | <LLOQ | | 3.12 | >ULOQ | | 4530* | | <LLOQ | | 605 | | >ULOQ | | 3100* | | <LLOQ | | 283 | | 116000 | |
| 9 | 17.6 | 2.06 | 12.8 | | <LLOQ | 94.1 | | 128 | | 1040* | | 27.0 | | 52.9 | | 84.8 | | 587 | | 8.99 | | 2120 | |
| 10 | 1.80 | 19.4 | 5.70 | | 4.92 | 23.6 | | 628 | | 201 | | 134 | | 13.8 | | 190 | | 91.3 | | 51.7 | | 1370 | |
| 11 | 1.73 | <LLOQ | <LLOQ | | <LLOQ | 4.95 | | 35.6 | | 13.6 | | 1.63 | | 1.91 | | 5.96 | | 4.32 | | <LLOQ | | 71.7 | |
| 12 | 17.0 | 34.2 | 16.9 | | 1.17 | 240 | | 506 | | 276 | | 16.2 | | 31.0 | | 100 | | 67.9 | | 1.67 | | 1310 | |
| 13 | 4.2 | 2.12 | 15.0 | | 1.12 | 35.9 | | 375 | | 559 | | 24.7 | | 9.41 | | 58.7 | | <LLOQ | | 2.83 | | 1090 | |
| 14 | 26.8 | 10.3 | <LLOQ | | <LLOQ | 48.7 | | 86.6 | | <LLOQ | | 2.19 | | 9.16 | | 23.9 | | <LLOQ | | <LLOQ | | 210 | |
| 15 | 2.33 | <LLOQ | <LLOQ | | <LLOQ | 23.2 | | 53.3 | | 101 | | 8.29 | | 5.62 | | 8.68 | | 23.0 | | 1.01 | | 228 | |
| 16 | 6680* | <LLOQ | 49.6 | | 12.5 | >ULOQ | | 2370* | | 4450* | | 1950* | | >ULOQ | | 3090* | | 5400* | | 965 | | 125000 | |
| 17 | 2.55 | 15.6 | 1.25 | | <LLOQ | 6.20 | | 2680* | | <LLOQ | | 59.6 | | 5.18 | | 219 | | 104 | | 20.8 | | 3120 | |
| 18 | 158 | 20.49 | 6.45 | | <LLOQ | 464 | | 585 | | 64.4 | | 18.7 | | 55.7 | | 92.9 | | 122.9 | | 3.65 | | 1590 | |
| 19 | 29.9 | 55.2 | <LLOQ | | 1.71 | 109 | | 600 | | <LLOQ | | 35.6 | | 9.33 | | 57.7 | | <LLOQ | | 2.69 | | 903 | |
| 20 | 58.2 | 104 | 114 | | 7.32 | 124 | | 2690* | | 281 | | 201 | | 5.21 | | 166 | | 130 | | 20.0 | | 3900 | |
| 21 | 3.20 | 2.00 | <LLOQ | | <LLOQ | 4.28 | | 460 | | <LLOQ | | 51.7 | | 1.26 | | 19.6 | | <LLOQ | | 9.57 | | 553 | |
| 22 | <LLOQ | 12.8 | 41.9 | | 9.17 | 167 | | 280 | | 725 | | 218 | | 3.67 | | 234 | | 246 | | 53.6 | | 1990 | |
| 23 | 26.8 | <LLOQ | <LLOQ | | <LLOQ | 162 | | 212 | | <LLOQ | | 9.10 | | 8.55 | | 10.6 | | <LLOQ | | <LLOQ | | 432 | |
| 24 | 11.8 | 4.67 | 6.76 | | <LLOQ | 37.2 | | 501 | | 380 | | 50.1 | | 14.4 | | 67.8 | | 118 | | 5.81 | | 1200 | |
| 25 | 2.79 | 2.11 | 1.29 | | <LLOQ | 22.8 | | 65.8 | | 75.4 | | 2.20 | | 2.18 | | 5.59 | | 5.41 | | <LLOQ | | 186 | |
| 26 | 14.5 | 4.23 | 2.38 | | <LLOQ | 92.1 | | 440 | | 66.5 | | 8.88 | | 12.1 | | 62.3 | | 23.6 | | 1.89 | | 730 | |
| 27 | 14.0 | 2.45 | 1.35 | | <LLOQ | 10.2 | | 671 | | <LLOQ | | 147 | | 1.93 | | 216 | | <LLOQ | | 33.0 | | 1100 | |
| 28 | 4.05 | 9.42 | 7.31 | | <LLOQ | 23.8 | | 65.4 | | 19.3 | | 5.38 | | 7.01 | | 13.6 | | 8.16 | | <LLOQ | | 164 | |
| 29 | 13.6 | <LLOQ | 2.04 | | <LLOQ | 11.1 | | 21.5 | | <LLOQ | | 1.86 | | 3.19 | | 5.41 | | 29.0 | | <LLOQ | | 89.7 | |
| 30 | 4.30 | 4.25 | <LLOQ | | <LLOQ | 8.64 | | 903 | | <LLOQ | | 42.8 | | 1.73 | | 77.3 | | <LLOQ | | 3.50 | | 1050 | |
| 31 | 6.1 | <LLOQ | 4.53 | | <LLOQ | 14.1 | | 89.7 | | 228 | | 4.35 | | 2.55 | | 14.0 | | 31.4 | | <LLOQ | | 396 | |
| 32 | 4.91 | <LLOQ | <LLOQ | | <LLOQ | 6.10 | | 22.8 | | 11.4 | | 39.1 | | 6.44 | | 6.63 | | 8.15 | | <LLOQ | | 108 | |
| 33 | 1560* | 5.79 | <LLOQ | | 2.16 | 9540* | | 701 | | <LLOQ | | 256 | | 337 | | 27.8 | | <LLOQ | | 12.0 | | 12400 | |
| 34 | 14.4 | 1.84 | 3.28 | | <LLOQ | 20.6 | | 96.8 | | 153 | | 3.35 | | 3.76 | | 9.84 | | 23.6 | | <LLOQ | | 332 | |
| 35 | <LLOQ | 2.00 | <LLOQ | | <LLOQ | 3.24 | | 543 | | <LLOQ | | 14.7 | | 1.02 | | 60.3 | | <LLOQ | | 1.56 | | 629 | |
| 36 | 10.2 | 1.46 | <LLOQ | | <LLOQ | 38.1 | | 263 | | 47.0 | | 11.1 | | 9.66 | | 148 | | 52.9 | | 8.06 | | 591 | |
| 37 | 1.58 | <LLOQ | <LLOQ | | <LLOQ | 1.08 | | 13.5 | | 3.90 | | 11.9 | | <LLOQ | | 3.81 | | 3.25 | | 5.62 | | 46.6 | |
| 38 | 20.8 | 58.7 | 72.4 | | 1.93 | 9.54 | | 34.9 | | 63.7 | | 7.30 | | 1.25 | | 3.43 | | 3.30 | | 278 | | 293 | |
| 39 | 1.46 | <LLOQ | <LLOQ | | <LLOQ | 3.51 | | 60.5 | | <LLOQ | | 28.1 | | 1.26 | | 4.21 | | 1.05 | | 1.31 | | 103 | |
| 40 | 10.0 | 1.02 | <7.35 | | <LLOQ | 30.8 | | 145 | | 504 | | 13.2 | | 11.0 | | <LLOQ | | 141 | | 5.20 | | 869 | |
| Mean | 673 | 12.8 | 13.7 | | 2.05 | 4150 | | 735 | | 509 | | 177 | | 3770 | | 343 | | 320 | | 63.2 | | 10800 | |
| Median | 12.7 | 2.84 | 2.03 | | 0.50 | 27.3 | | 408 | | 55.4 | | 21.7 | | 6.27 | | 58.2 | | 18.8 | | 2.88 | | 616 | |

LLOQ, 1.00 µg/L; ULOQ, 1,000 µg/L (10,000 µg/L under consideration of the dilution integrity); *, result from 1:10-dilution; values >ULOQ were considered as 50,000 µg/L for calculation of mean, median, and sum values; ∑, sum of all sulfated / non-suflated bile acids.
